# Supplementary material
Source: PubMed Central journal article supplement (PMC5599306)
Supplement: NIHMS852510-supplement-supplement_1.pdf [file NIHMS852510-supplement-supplement_1.pdf]

Table S1: rANOVA results for Errors vs. Hits (response-locked data). \* $p < 0.05$ ; \*\* $p < 0.01$ ; \*\*\* $p < 0.001$ ; \*\*\*\* $p < 0.0001$ .

### Theta-Band Results (4-7Hz)

| <i>Omnibus rANOVA</i> | Trial Type       |          | Trial Type x Group |          | Trial Type x Electrode |          | Trial Type x Group x Electrode |          |
|-----------------------|------------------|----------|--------------------|----------|------------------------|----------|--------------------------------|----------|
|                       | <i>F</i> (1,105) | <i>p</i> | <i>F</i> (1,105)   | <i>p</i> | <i>F</i> (2,210)       | <i>p</i> | <i>F</i> (2,210)               | <i>p</i> |
| <i>Theta</i>          | 148.8            | ****     | 8.8                | **       | 66.6                   | ****     | 1.9                            | ns       |

| <i>Follow-up Tests</i>      | Trial Type      |          | Trial Type x Electrode |          |
|-----------------------------|-----------------|----------|------------------------|----------|
|                             | <i>F</i> (1,48) | <i>p</i> | <i>F</i> (2,96)        | <i>p</i> |
| <i>Control Participants</i> | 78.2            | ****     | 36.8                   | ****     |
| <i>Patient Participants</i> | <i>F</i> (1,57) | <i>p</i> | <i>F</i> (2,114)       | <i>p</i> |
|                             | 66.5            | ****     | 28.6                   | ****     |

### Alpha-Band Results (8-12Hz)

| <i>Omnibus rANOVA</i> | Trial Type       |          | Trial Type x Group |          | Trial Type x Electrode |          | Trial Type x Group x Electrode |          |
|-----------------------|------------------|----------|--------------------|----------|------------------------|----------|--------------------------------|----------|
|                       | <i>F</i> (1,105) | <i>p</i> | <i>F</i> (1,105)   | <i>p</i> | <i>F</i> (2,210)       | <i>p</i> | <i>F</i> (2,210)               | <i>p</i> |
| <i>Alpha</i>          | 25.4             | ****     | <1                 | ns       | 14.2                   | ****     | <1                             | ns       |

Table S2: rANOVA results for Previous Errors vs. Previous Correct trials (stimulus-locked data).  
 \* $p < 0.05$ ; \*\* $p < 0.01$ ; \*\*\* $p < 0.001$ ; \*\*\*\* $p < 0.0001$ .

### Theta-Band Results (4-7Hz)

| <i>Omnibus rANOVA</i> | Trial Type       |          | Trial Type x Group |          | Trial Type x Electrode |          | Trial Type x Group x Electrode |          |
|-----------------------|------------------|----------|--------------------|----------|------------------------|----------|--------------------------------|----------|
|                       | <i>F</i> (1,114) | <i>p</i> | <i>F</i> (1,114)   | <i>p</i> | <i>F</i> (2,228)       | <i>p</i> | <i>F</i> (2,228)               | <i>p</i> |
| <i>Theta</i>          | 29.9             | ****     | 5.2                | *        | 33.5                   | ****     | 1.1                            | ns       |

| <i>Follow-up Tests</i>      | Trial Type      |          | Trial Type x Electrode |          |
|-----------------------------|-----------------|----------|------------------------|----------|
|                             | <i>F</i> (1,52) | <i>p</i> | <i>F</i> (2,104)       | <i>p</i> |
| <i>Control Participants</i> | 26.7            | ****     | 22.7                   | ****     |
| <i>Patient Participants</i> | <i>F</i> (1,62) | <i>p</i> | <i>F</i> (2,124)       | <i>p</i> |
|                             | 5.8             | *        | 12.0                   | ****     |

### Alpha-Band Results (8-12Hz)

| <i>Omnibus rANOVA</i> | Trial Type       |          | Trial Type x Group |          | Trial Type x Electrode |          | Trial Type x Group x Electrode |          |
|-----------------------|------------------|----------|--------------------|----------|------------------------|----------|--------------------------------|----------|
|                       | <i>F</i> (1,114) | <i>p</i> | <i>F</i> (1,114)   | <i>p</i> | <i>F</i> (2,228)       | <i>p</i> | <i>F</i> (2,228)               | <i>p</i> |
| <i>Alpha</i>          | 7.4              | **       | <1                 | ns       | 9.8                    | ****     | 4.0                            | *        |

| <i>Follow-up Tests</i>      | Trial Type      |          | Trial Type x Electrode |          |
|-----------------------------|-----------------|----------|------------------------|----------|
|                             | <i>F</i> (1,52) | <i>p</i> | <i>F</i> (2,104)       | <i>p</i> |
| <i>Control Participants</i> | 6.0             | *        | 10.0                   | **       |
| <i>Patient Participants</i> | <i>F</i> (1,62) | <i>p</i> | <i>F</i> (2,124)       | <i>p</i> |
|                             | 2.4             | ns       | 1.6                    | ns       |

Table S3: rANOVA results for Incongruent-Incongruent vs. Congruent-Incongruent trials (stimulus-locked data). \* $p < 0.05$ ; \*\* $p < 0.01$ ; \*\*\* $p < 0.001$ ; \*\*\*\* $p < 0.0001$ .

**Theta-Band Results (4-7Hz)**

| <i>Omnibus rANOVA</i> | Trial Type       |          | Trial Type x Group |          | Trial Type x Electrode |          | Trial Type x Group x Electrode |          |
|-----------------------|------------------|----------|--------------------|----------|------------------------|----------|--------------------------------|----------|
|                       | <i>F</i> (1,113) | <i>p</i> | <i>F</i> (1,113)   | <i>p</i> | <i>F</i> (2,226)       | <i>p</i> | <i>F</i> (2,226)               | <i>p</i> |
| <i>Theta</i>          | 26.9             | ****     | <1                 | ns       | 11.0                   | ****     | <1                             | ns       |

**Alpha-Band Results (8-12Hz)**

| <i>Omnibus rANOVA</i> | Trial Type       |          | Trial Type x Group |          | Trial Type x Electrode |          | Trial Type x Group x Electrode |          |
|-----------------------|------------------|----------|--------------------|----------|------------------------|----------|--------------------------------|----------|
|                       | <i>F</i> (1,113) | <i>p</i> | <i>F</i> (1,113)   | <i>p</i> | <i>F</i> (2,226)       | <i>p</i> | <i>F</i> (2,226)               | <i>p</i> |
| <i>Alpha</i>          | 1.3              | ns       | <1                 | ns       | 1.9                    | ns       | <1                             | ns       |

Table S4: rANOVA results for Slow Congruent Hits vs. Fast Congruent Hits (stimulus-locked data). \* $p < 0.05$ ; \*\* $p < 0.01$ ; \*\*\* $p < 0.001$ ; \*\*\*\* $p < 0.0001$ .

**Theta-Band Results (4-7Hz)**

| <i>Omnibus rANOVA</i> | Trial Type       |          | Trial Type x Group |          | Trial Type x Electrode |          | Trial Type x Group x Electrode |          |
|-----------------------|------------------|----------|--------------------|----------|------------------------|----------|--------------------------------|----------|
|                       | <i>F</i> (1,124) | <i>p</i> | <i>F</i> (1,124)   | <i>p</i> | <i>F</i> (2,248)       | <i>p</i> | <i>F</i> (2,248)               | <i>p</i> |
| <i>Theta</i>          | 4.5              | *        | <1                 | ns       | 5.9                    | **       | <1                             | ns       |

**Alpha-Band Results (8-12Hz)**

| <i>Omnibus rANOVA</i> | Trial Type       |          | Trial Type x Group |          | Trial Type x Electrode |          | Trial Type x Group x Electrode |          |
|-----------------------|------------------|----------|--------------------|----------|------------------------|----------|--------------------------------|----------|
|                       | <i>F</i> (1,124) | <i>p</i> | <i>F</i> (1,124)   | <i>p</i> | <i>F</i> (2,248)       | <i>p</i> | <i>F</i> (2,248)               | <i>p</i> |
| <i>Alpha</i>          | 16.2             | ****     | 1.1                | ns       | 1.7                    | ns       | <1                             | ns       |

Table S4: rANOVA results for Slow Congruent Hits vs. Fast Congruent Hits (stimulus-locked data). \* $p < 0.05$ ; \*\* $p < 0.01$ ; \*\*\* $p < 0.001$ ; \*\*\*\* $p < 0.0001$ .

**Theta-Band Results (4-7Hz)**

| <i>Omnibus rANOVA</i> | Trial Type       |          | Trial Type x Group |          | Trial Type x Electrode |          | Trial Type x Group x Electrode |          |
|-----------------------|------------------|----------|--------------------|----------|------------------------|----------|--------------------------------|----------|
|                       | <i>F</i> (1,124) | <i>p</i> | <i>F</i> (1,124)   | <i>p</i> | <i>F</i> (2,248)       | <i>p</i> | <i>F</i> (2,248)               | <i>p</i> |
| <i>Theta</i>          | 4.5              | *        | <1                 | ns       | 5.9                    | **       | <1                             | ns       |

**Alpha-Band Results (8-12Hz)**

| <i>Omnibus rANOVA</i> | Trial Type       |          | Trial Type x Group |          | Trial Type x Electrode |          | Trial Type x Group x Electrode |          |
|-----------------------|------------------|----------|--------------------|----------|------------------------|----------|--------------------------------|----------|
|                       | <i>F</i> (1,124) | <i>p</i> | <i>F</i> (1,124)   | <i>p</i> | <i>F</i> (2,248)       | <i>p</i> | <i>F</i> (2,248)               | <i>p</i> |
| <i>Alpha</i>          | 16.2             | ****     | 1.1                | ns       | 1.7                    | ns       | <1                             | ns       |

Table S5: rANOVA results comparing Slow Congruent Hits vs. Fast Congruent Hits (stimulus-locked data) in participants with schizophrenia as a function of total SAPS scores (median split). \* $p < 0.05$ ; \*\* $p < 0.01$ ; \*\*\* $p < 0.001$ ; \*\*\*\* $p < 0.0001$ .

### Alpha-Band Results (8-12Hz)

| <i>Omnibus rANOVA</i> | Trial Type      |          | Trial Type x Group |          | Trial Type x Electrode |          | Trial Type x Group x Electrode |          |
|-----------------------|-----------------|----------|--------------------|----------|------------------------|----------|--------------------------------|----------|
|                       | <i>F</i> (1,52) | <i>p</i> | <i>F</i> (1,52)    | <i>p</i> | <i>F</i> (2,104)       | <i>p</i> | <i>F</i> (2,104)               | <i>p</i> |
| <i>Alpha</i>          | 10.4            | **       | 3.8                | 0.056    | 2.8                    | ns       | <1                             | ns       |

| <i>Follow-up Tests</i>         | Trial Type      |          | Trial Type x Electrode |          |
|--------------------------------|-----------------|----------|------------------------|----------|
|                                | <i>F</i> (1,25) | <i>p</i> | <i>F</i> (2,50)        | <i>p</i> |
| <i>Patients with Low SAPS</i>  | 8.9             | **       | <1                     | ns       |
| <i>Patients with High SAPS</i> | <i>F</i> (1,27) | <i>p</i> | <i>F</i> (2,54)        | <i>p</i> |
|                                | 1.4             | ns       | 3.3                    | ns       |
